# Supplementary material
Source: PubMed Central journal article supplement (PMC11558318)
Supplement: ijcep0017-0371-f5.pdf [file ijcep0017-0371-f5.pdf]

## Supplementary Material

### Sequence of the gene overexpressing PCSK7

ATGCCGAAGGGGAGGCAGAAAGTGCCACACTTGGATGCCCCCTGGGCCTGCCACCTGCCTCTGGCTGGA-  
ATTAGCCGGGCTCTTCTTACTGGTTCCCTGGGTCATGGGCCTGGCAGGGACAGGTGGGCCTGATGGCCA-  
GGGCACAGGGGGCCGAGCTGGGCTGTGCACCTGAAAGCCTGGAAGGTGACGGGGAGGAAGAGA-  
CTCTGGAGCAGCAGGCGGATGCCTTGGCCAGGCAGCAGGGCTGGTGAATGCTGGACGCATCGGAG-  
AGCTTCAGGGGCACTACCTCTTTGTCCAGCCTGTGGGCACAGGCCGGCCCTGGAGGTGGAGGCCAT-  
CCGGCAGCAGGTGGAGGCTGTGTTGGCTGGGCATGAAGCTGTGCGCTGGCACTCAGAGCAGAGGCTGCT-  
AAGGCGGGCCAAGCGCAGCGTCCACTTCAACGACCCCAAGTACCCGCAGCAATGGCACCTGAATAAC-  
CGACGGAGCCCGGCAGGGACATCAACGTGACGGGTGTGTGGGAACGCAATGTGACTGGGCGAGGGGT-  
GACGGTGGTGGTAGTGGATGACGGAGTGGAAACACACCATCCAGGACATTGCACCCAACCTATAGCCC-  
TGAGGGTAGCTATGACCTCAACTAATGACCCTGACCCCATGCCCAACCCGGATGTGGAGAATGGCAACCA-  
CCATGGCACGCGATGTGCAGGAGAGATCGCGGCTGTGCCAACAACAGCTTCTGTGCCGTGGGCG-  
TGGCCTACGGGAGCCGCATCGCAGGTATCCGGGTACTGGATGGACCTCTCACAGACAGCATGGAGGCAGTG-  
GCGTTCAACAAGCACTATCAGATCAATGACATCTACAGCTGCAGCTGGGGACCAGATGACGATG-  
GGAAGACAGTGGATGGCCCCCATCAGCTTGAAAAGGCTGCCTTACAACATGGGGTGATTGCTGGTCGCCAGGG-  
CTTTGGGAGCATCTTTGTGGTAGCCAGTGGCAACGGAGGCCAACACAACGACAACACTGCAACTACGAT-  
GGCTACGCCAACTCCATCTACACCGTCACCATAGGAGCTGTGGATGAGGAGGGACGCATGCCTTTCTATGCA-  
GAAGAATGTGCCTCCATGCTGGCAGTCACCTTCAGTGGTGGGGACAAGATGCTTCGGAGCATTGT-  
GACCACTGACTGGGACCTTCAGAAGGGCACTGGCTGCACTGAGGGCCACACAGGGACCTCAGCTGCAGCGCT-  
CTGGCAGCTGGCATGATAGCCTTAATGCTGCAGGTGCGGCCCTGCCTCACGTGGCGTGACGTCC-  
AGCACATCATTGTCTTCACAGCCACCCGGTATGAGGATCGCCGTGCAGAGTGGGTACCAACGAGGCAGGCTTC-  
AGCCATAGCCACCAGCACGGTTTTCGGCCTCCTCAACGCCTGGAGGCTCGTGAATGCAGCCAAGATC-  
TGGACATCTGTCCCTTACTTAGCATCCTACGTACGTCAGTCCCGTGTAAAAGAAAACAAGGCGATTCCGCAGTCCC-  
CCCGTTCCCTGGAGGTCCTGTGGAATGTCAGCAGGATGGACCTGGAGATGTCAGGGCTGAAGAC-  
CCTGGAGCATGTGGCAGTGACAGTCTCCATCACTACCCACGGCGCGGCAGCTTGGAGCTGAAGCTGTTCTGC-  
CCCAGTGGCATGATGTCCCTCATCGGCGCCCCCGCAGCATGGACTCGGATCCCAACGGCTTCA-  
ATGACTGGACCTTCTCACTGTGCGATGCTGGGGGAGAGAGCCCGAGGGACCTACAGGCTTGTATCAGGG-  
ATGTCGGGGATGAGTCATTCCAGGTCGGCATCCTCCGGCAATGGCAGCTGACCCTATATGGCTCTG-  
TGTGGAGTGCAGTAGACATCAGGGACAGACAAAGGCTGTAGAGAGTGCCATGAGTGGAAAATACCTGCAC-  
GATGACTTCGCCCTGCCCTGCCACCGGGCTGAAAATTCCTGAGGAAGATGGTTACACCATACCC-  
CCAACACCCTCAAGACCCTGGTGTGGTAGGCTGTTTACCCTCTTCTGGACTGTTTACTACATGCTGGAAGTAT-  
ATTTGAGCCAGAGGAATGTGGCTTCCAATCAAGTTTGTAGGAGTGGACCCTGCCACTGGCCCCATC-  
GGAGCCGAAAGCCAAGGAGGAAGGGACAGAGCTAGAATCAGTGCCACTTTCAGCAGCAAGGATCCAGAC-  
GAAGTGGAAACAGAGAGCAGGGGCCCTCCACCACCTCTGACCTCCTTGCCCCAGACCTGCTGGAG-  
CAAGGGGACTGGAGCCTGTCCAGAACAAGAGCGCCCTGGACTGCCCTCATCAGCACCTAGACGTACCGCA-  
CGGGAAGGAGGAGCAGATCTGCTGA
